# Supplementary material for: Elemental bioimaging by means of LA-ICP-OES: investigation of the calcium, sodium and potassium distribution in tobacco plant stems and leaf petioles
Source: Royal Society of Chemistry journal article supplement (doi:10.1039/c7mt00003k), 2017-01-01
Supplement: c7mt00003k1.pdf [file c7mt00003k1.pdf]

## Supporting Information for

### **Elemental bioimaging by means of LA-ICP-OES: Investigation of the calcium, sodium and potassium distribution in tobacco plant stems**

Georgina M. Thyssen,<sup>†</sup> Michael Holtkamp,<sup>†</sup> Heidi Kaulfürst-Soboll,<sup>‡</sup> Christoph A. Wehe,<sup>†</sup> Michael Sperling,<sup>†,§</sup> Antje von Schaewen,<sup>‡</sup> and Uwe Karst\*,<sup>†</sup>

*<sup>†</sup>University of Münster, Institute of Inorganic and Analytical Chemistry, Corrensstraße 30, 48149 Münster, Germany*

*<sup>‡</sup>University of Münster, Institute of Plant Biology and Biotechnology, Schlossplatz 7, 48149 Münster, Germany*

*<sup>§</sup>European Virtual Institute for Speciation Analysis (EVISA), Mendelstraße 11, 48149 Münster, Germany*

### Figure S1 and S2

To ensure the reliability of the results obtained by bioimaging by means of LA-ICP-OES, further parts of tobacco plant stem sections have been analysed. Examples for the element distribution maps are shown in Figure S1 and Figure S2. The general Ca, Na and K distribution shows the same pattern as revealed in the main article (Figure 1).

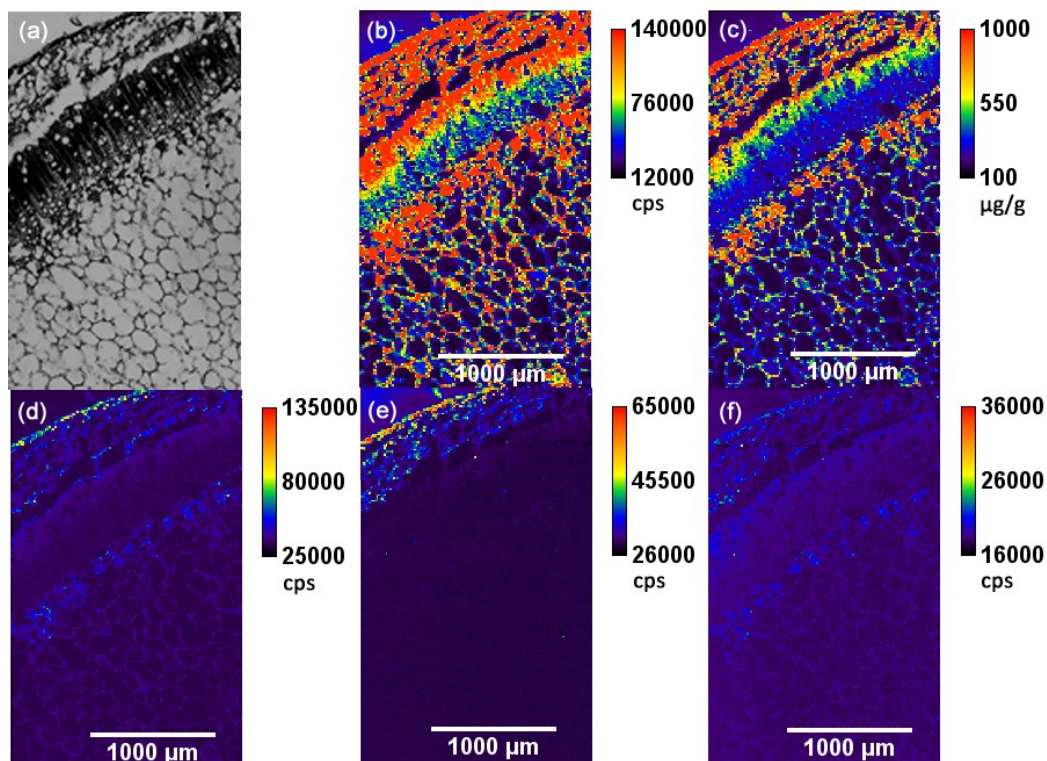

Figure S1 Microscopic image (a) and element distribution maps of a tobacco plant stem cross section observed with LA-ICP-OES: Ca at a wavelength of 393.366 nm (b), Ca (quantitatively) at a wavelength of 396.847 nm (c), Ca at a wavelength of 422.673 nm (d), Na at a wavelength of 589.592 nm (e), and K at a wavelength of 766.491 nm (f).

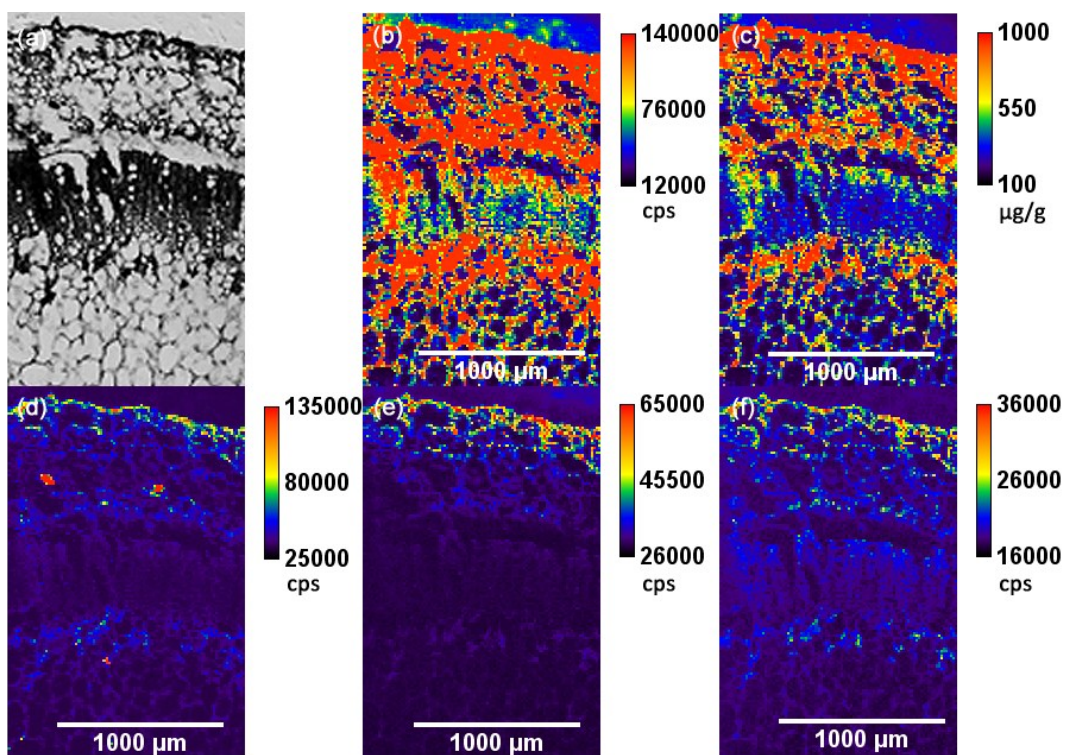

Figure S2 Microscopic image (a) and element distribution maps of a tobacco plant stem cross section observed with LA-ICP-OES: Ca at a wavelength of 393.366 nm (b), Ca (quantitatively) at a wavelength of 396.847 nm (c), Ca at a wavelength of 422.673 nm (d), Na at a wavelength of 589.592 nm (e), and K at a wavelength of 766.491 nm (f).
